# Supplementary material for: Superior ion release properties and antibacterial efficacy of nanostructured zeolites ion-exchanged with zinc, copper, and iron
Source: Royal Society of Chemistry journal article supplement (doi:10.1039/c8ra06556j), 2018-01-01
Supplement: c8ra06556j1.pdf [file c8ra06556j1.pdf]

## Supporting Information

# Superior Ion Release Properties and Antibacterial Efficacy of Nanostructured Zeolites Ion-Exchanged with Zinc, Copper, and Iron

*Shaojiang Chen<sup>1</sup>, John Popovich<sup>2</sup>, Wenwen Zhang<sup>1</sup>, Collin Ganser<sup>3</sup>, Shelley E. Haydel<sup>2,3\*</sup> and  
Dong-Kyun Seo<sup>1\*</sup>*

<sup>1</sup>School of Molecular Sciences, Arizona State University, Tempe, AZ 85287, USA

<sup>2</sup>Biodesign Institute Center for Immunotherapy, Vaccines and Virotherapy, Arizona State  
University, Tempe AZ 85287, USA

<sup>3</sup>School of Life Sciences, Arizona State University, Tempe, AZ 85287, USA

*KEYWORDS: nanostructured zeolites, zinc, copper and iron metal ion release, antimicrobial, antibacterial, methicillin-resistant Staphylococcus aureus, MRSA, antimicrobial susceptibility*

**Table S1.** Amount of zinc, copper, and iron ions released from zeolites (1.0 mg/mL) in saline (0.9%, NaCl; w/v) for different contact times.

| Sample  | Metal ion content <sup>a</sup><br>(mmol/g) | Ion release amount (mmol/g); Release extent (%) <sup>a</sup> |                     |                     |
|---------|--------------------------------------------|--------------------------------------------------------------|---------------------|---------------------|
|         |                                            | 3 min                                                        | 1 h                 | 2 h                 |
| Zn-mZeo | 1.38 (1)                                   | 0.58 (3); 42.2 (21)                                          | 0.68 (2); 49.5 (17) | 0.69 (2); 50.3 (9)  |
| Zn-nZeo | 1.12 (3)                                   | 0.70 (3); 62.7 (26)                                          | 0.81 (3); 72.4 (29) | 0.82 (2); 73.3 (27) |
| Cu-mZeo | 1.77 (2)                                   | 0.16 (2); 8.80 (89)                                          | 0.23 (1); 12.7 (4)  | 0.22 (1); 12.3 (3)  |
| Cu-nZeo | 1.30 (2)                                   | 0.41 (1); 31.4 (12)                                          | 0.47 (1); 36.3 (12) | 0.46 (2); 35.6 (13) |
| Fe-mZeo | 1.32 (1)                                   | 0.00 (0); 0.1 (0)                                            | 0.00 (0); 0.0 (0)   | 0.00 (0); 0.0 (0)   |
| Fe-nZeo | 0.934 (4)                                  | 0.00 (6); 0.1 (1)                                            | 0.00 (0); 0.2 (1)   | 0.00 (0); 0.3 (1)   |

<sup>a</sup>Standard deviations are shown in parentheses.

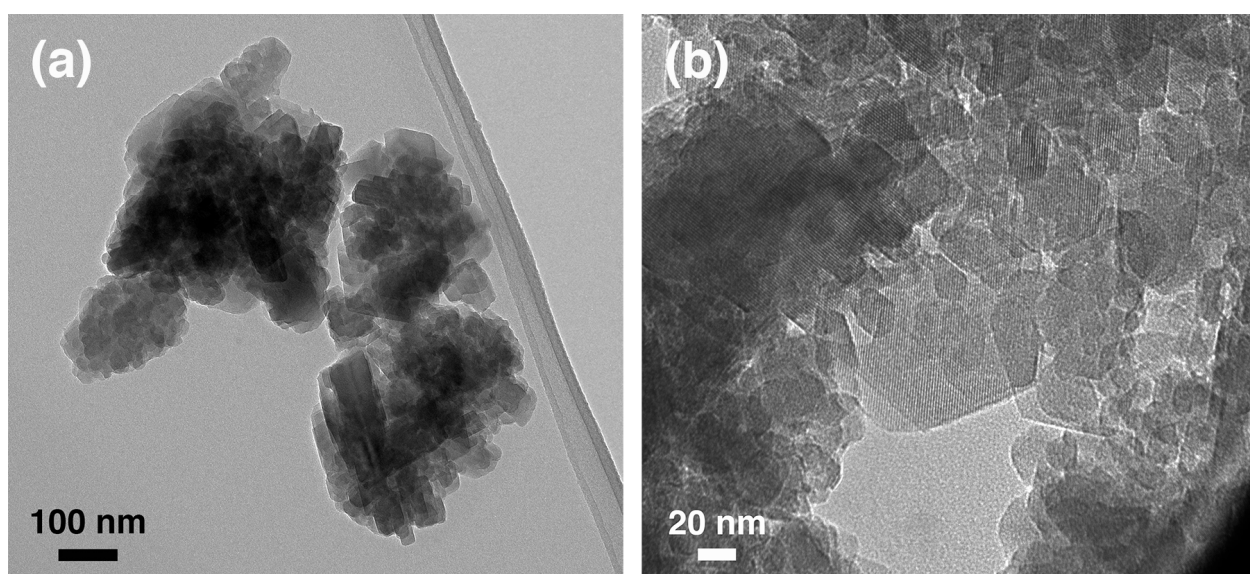

**Fig. S1** Transmission electron microscopy images of parent nanostructured zeolites (Na-nZeo) in (a) low and (b) high magnification ratios.

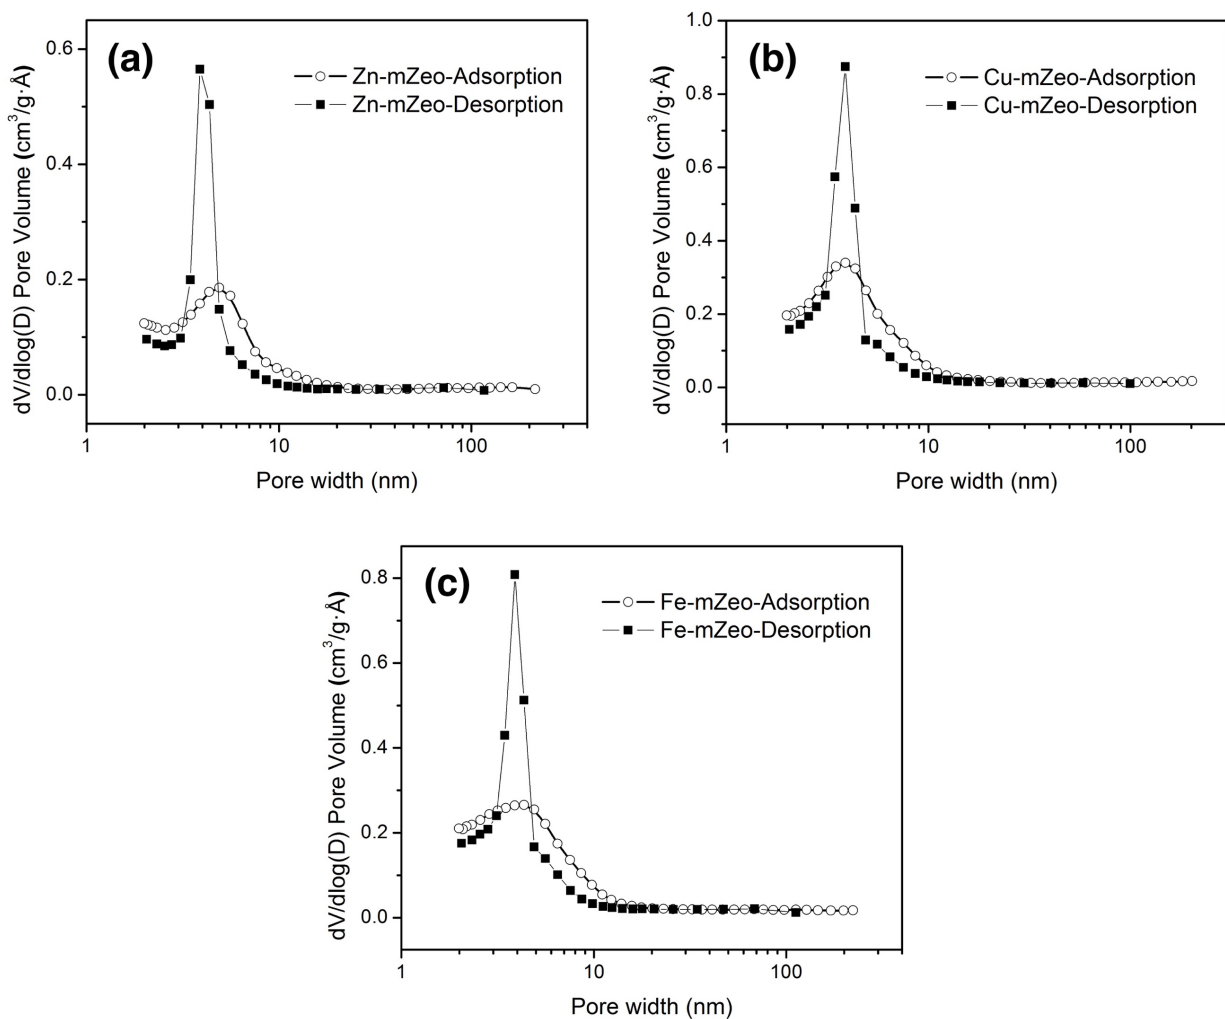

**Fig. S2** The BJH pore width distributions of (a) Zn-mZeolite, (b) Cu-mZeolite, and (c) Fe-mZeolite from both adsorption and desorption branches. The distribution curves from the desorption branch showed a very sharp peak, which is an artificial peak caused by the spontaneous evaporation of metastable pore liquid (due to the tensile strength effect).<sup>1</sup>

## References

1. S. Lowell, J. E. Shields, M. A. Thomas and M. Thommes, *Characterization of porous solids and powders: surface area, pore size and density*, Springer Science & Business Media, 2012.
